# Supplementary material
Source: publisher figshare collection journal article supplement (https://acs.figshare.com/ndownloader/files/14902166)
Supplement: Supplementary file 1 [file 14902166]

**Supporting Information for manuscript:**

**Flexible biosensors for the impedimetric detection of protein targets using silk-conductive polymer biocomposites**

Meng Xu <sup>‡</sup>, Vamsi Yadavalli <sup>‡\*</sup>

<sup>‡</sup> Department of Chemical and Life Science Engineering

Virginia Commonwealth University

601 W Main Street, Richmond VA, USA 23284

\* Corresponding author: E-mail: [vyadavalli@vcu.edu](mailto:vyadavalli@vcu.edu), Phone:

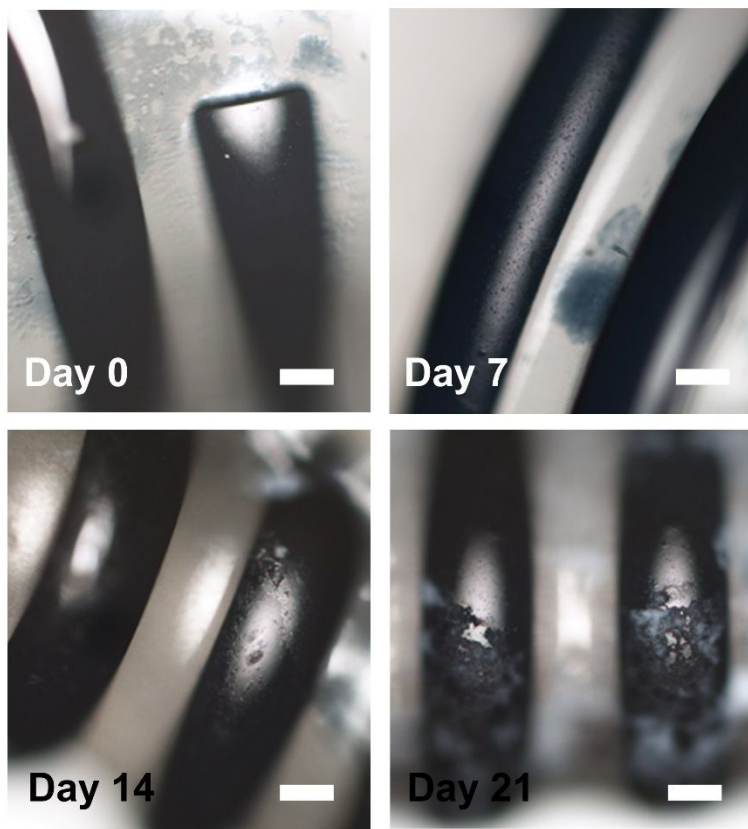

**Figure S1:** Optical images showing the gradual degradation of the electrodes composed of SPP/PEDOT: PSS in a proteolytic solution (*Protease XIV*). Following 21 days, the electrodes completely broke down and could not be imaged. This degradation behavior itself can be controlled over a period of weeks to months.

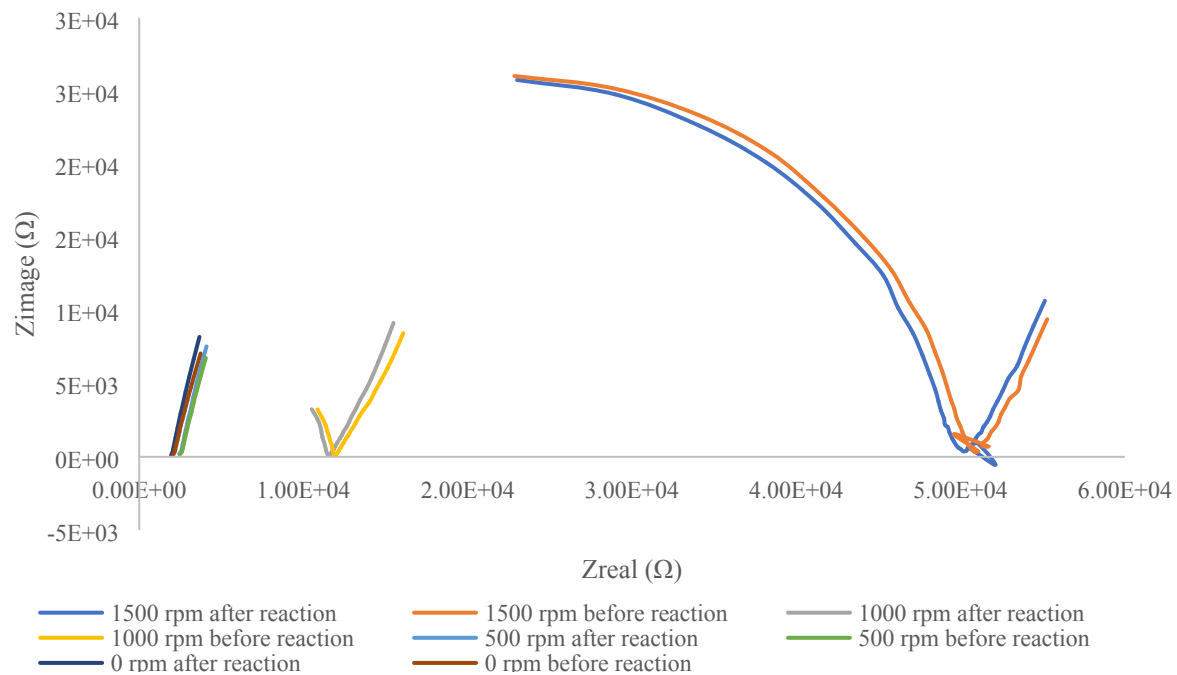

**Figure S2:** Nyquist plots of different spin-coating rates for the fabrication of conductive patterns. (A). The speed of spin-coating was evaluated using EIS. The target was BSA, as a surrogate for VEGF. 1  $\mu$ M of BSA was detected with electrodes containing BSA antibody (SPP/PEDOT: PSS/Ab). The same parameters were used for the VEGF antibody.

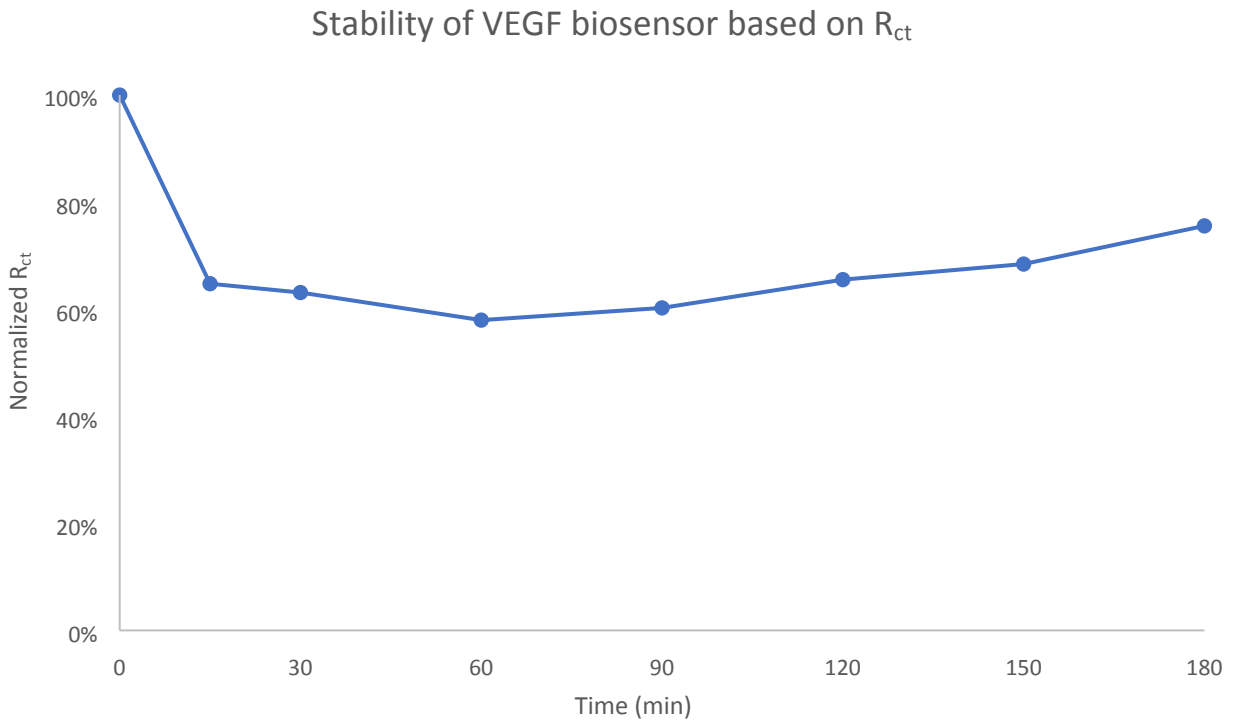

**Figure S3:** Equilibration of the electrodes in buffer solution over time. Since the electrodes are fabricated in a dry condition, it is important to test their stability and equilibration needed in order to achieve a fast response.

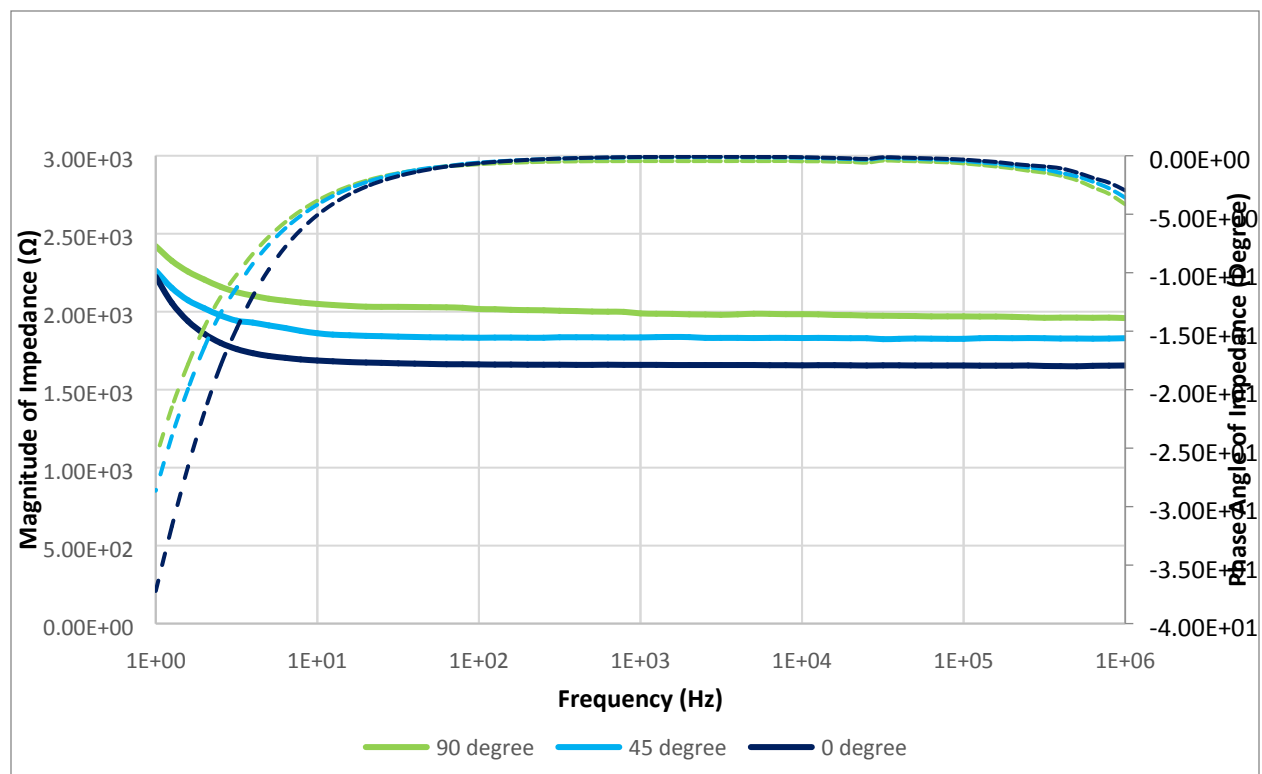

**Figure S4:** The electrochemical impedance of the developed flexible biosensor at no-bending ( $0^\circ$ ) and inward bending ( $45^\circ$  and  $90^\circ$ ) states. Experiments were conducted in PBS. The solid and dotted lines are the magnitude and the phase angle of the impedance, respectively.
